# Supplementary material
Source: publisher figshare collection journal article supplement (https://diabetesjournals.figshare.com/articles/dataset/_/16441407)
Supplement: Supplementary file 1 [file 1]

Table 1—Anthropometric and biochemical data

| Variable                      | Healthy controls (n = 29)         | Type 2 diabetes patients (n = 31) | LADA patients (n = 30)          | Classic type 1                    | <i>P</i> |
|-------------------------------|-----------------------------------|-----------------------------------|---------------------------------|-----------------------------------|----------|
|                               |                                   |                                   |                                 | diabetes patients (n = 29)        |          |
| Male/female                   | 11/18                             | 11/20                             | 10/20                           | 11/18                             |          |
| Age (years)                   | 34.0 (28.50–52.5)                 | 39.0 (31.00–48.0)                 | 36.5 (30.5–45.0)                | 35.0 (31.0–47.5)                  | 0.932    |
| Duration of diabetes (months) |                                   | 36.0 (12.0–84.0) <sup>a</sup>     | 24.0 (2.5–36.0) <sup>b</sup>    | 36.0 (13.0–108.0) <sup>a</sup>    | <0.001   |
| BMI (kg/m <sup>2</sup> )      | 22.14(19.99–24.41) <sup>a,b</sup> | 23.51(21.22–25.40) <sup>a</sup>   | 20.48(18.31–22.29) <sup>c</sup> | 21.85(20.79–23.02) <sup>b,c</sup> | 0.002    |
| WHR                           | 0.86 (0.83–0.92)                  | 0.92 (0.87–0.94)                  | 0.88 (0.83–0.94)                | 0.90 (0.85–0.93)                  | 0.221    |
| SBP (mmHg)                    | 112 (106–120)                     | 120 (110–130)                     | 110 (106–125)                   | 118 (109–130)                     | 0.130    |
| DBP (mmHg)                    | 71 (65–77)                        | 75 (72–80)                        | 73 (64–80)                      | 77 (70–84)                        | 0.060    |
| HbA1 <sub>c</sub> (%)         | 5.30 (5.20–5.50) <sup>a</sup>     | 9.00 (7.00–10.60) <sup>b</sup>    | 9.10 (7.08–11.80) <sup>b</sup>  | 8.60 (6.80–9.30) <sup>b</sup>     | <0.001   |
| HbA1 <sub>c</sub> (mmol/mol)  | 34(33–37) <sup>a</sup>            | 75(53–92) <sup>b</sup>            | 76(54–105) <sup>b</sup>         | 70(51–78) <sup>b</sup>            | <0.001   |
| FPG (mmol/L)                  | 4.75 (4.43–5.28) <sup>a</sup>     | 6.90 (6.17–7.40) <sup>b</sup>     | 6.80 (5.70–8.43) <sup>b</sup>   | 7.00 (5.58–8.70) <sup>b</sup>     | <0.001   |
| FCP (ng/ml)                   | 1.08 (0.86–1.36) <sup>a</sup>     | 0.78 (0.50–1.26) <sup>b</sup>     | 0.37 (0.26–0.50) <sup>c</sup>   | 0.00 (0.00–0.05) <sup>d</sup>     | <0.001   |
| TC (mg/dL)                    | 4.57 (4.12–4.89)                  | 4.90 (3.68–5.33)                  | 4.34 (3.87–5.27)                | 4.58 (4.08–5.21)                  | 0.767    |
| TG (mg/dL)                    | 1.08 (0.89–1.21)                  | 1.35 (0.97–2.12)                  | 0.91 (0.62–1.43)                | 1.03 (0.76–1.50)                  | 0.050    |
| HDL-c (mg/dL)                 | 1.36 (1.26–1.56) <sup>a</sup>     | 1.15 (0.94–1.27) <sup>b</sup>     | 1.33 (1.10–1.62) <sup>a</sup>   | 1.23 (1.07–1.55) <sup>a</sup>     | 0.004    |
| LDL-c (mg/dL)                 | 2.56 (2.38–2.78)                  | 2.99 (2.16–3.27)                  | 2.33 (1.85–3.03)                | 2.34 (2.03–2.84)                  | 0.185    |
| IL-10 (pg/mL)                 | 1.63 (1.23–1.93) <sup>a</sup>     | 1.44 (1.21–1.66) <sup>a</sup>     | 1.32 (1.03–1.48) <sup>b</sup>   | 1.44 (1.22–1.77) <sup>a</sup>     | 0.008    |
| TNF- $\alpha$ (pg/mL)         | 4.49 (4.06–5.09) <sup>a</sup>     | 5.60 (5.16–6.28) <sup>b</sup>     | 5.44 (4.60–6.74) <sup>b</sup>   | 5.20 (4.26–6.67) <sup>b</sup>     | 0.002    |
| IL-6 (pg/mL)                  | 1.09 (0.92–1.27) <sup>a</sup>     | 2.69 (1.55–5.68) <sup>b</sup>     | 1.61 (1.25–2.74) <sup>c</sup>   | 1.74 (1.18–3.04) <sup>c</sup>     | <0.001   |
| IL-1 $\beta$ (pg/mL)          | 2.19 (2.03–2.64) <sup>a</sup>     | 3.03 (2.47–3.77) <sup>b</sup>     | 2.67 (2.03–2.97) <sup>c</sup>   | 2.47 (2.03–3.18) <sup>c</sup>     | <0.001   |
| LBP (ng/mL)                   | 26.35(23.58–29.24) <sup>a</sup>   | 32.91(29.41–36.50) <sup>b,c</sup> | 34.73(29.48–39.89) <sup>b</sup> | 29.88(26.62–33.44) <sup>c</sup>   | <0.001   |

Data are median (25th–75th percentile) unless otherwise indicated. DBP, diastolic blood pressure; FCP, fasting C-peptide; HDL-C, HDL cholesterol; LDL-C, LDL cholesterol; SBP, systolic blood pressure; TC, total cholesterol; TG, triglyceride; WHR, waist-to-hip ratio. Different superscripted symbols (a, b, c, d) in a row indicate that the medians of the different groups are significantly different ( $P < 0.05$ ).
