# Supplementary material
Source: publisher figshare collection journal article supplement (https://diabetesjournals.figshare.com/articles/dataset/_/16441407)
Supplement: Supplementary file 2 [file 1]

**Supplementary Table 1—Clinical characteristics, autoantibodies, medication, and defecation in the studied sample**

| Variable                                                     | Healthy controls (n = 29)           | Type 2 diabetes patients (n = 31)     | LADA patients (n = 30)                | Classic type 1 diabetes patients (n = 29) | <i>P</i> |
|--------------------------------------------------------------|-------------------------------------|---------------------------------------|---------------------------------------|-------------------------------------------|----------|
| RBC ( $\times 10^{12}/L$ )                                   | 4.70 (4.30–4.98)                    | 4.72 (4.46–4.98)                      | 4.56 (4.35–4.90)                      | 4.42 (4.21–4.85)                          | 0.28     |
| Hemoglobin (g/L)                                             | 144.00 (127.50–152.50)              | 144.00 (132.00–149.00)                | 136.50 (126.00–149.00)                | 135.00 (124.50–146.50)                    | 0.547    |
| WBC ( $\times 10^9/L$ )                                      | 5.70 (4.68–6.40) <sup>a,c</sup>     | 7.00 (5.47–7.85) <sup>b</sup>         | 5.01 (4.41–6.47) <sup>a</sup>         | 6.36 (5.24–7.59) <sup>b,c</sup>           | 0.004    |
| ALT (U/L)                                                    | 16.80 (12.80–21.60)                 | 19.00 (14.10–30.10)                   | 17.00 (13.25–20.55)                   | 15.85 (12.33–21.73)                       | 0.300    |
| AST (U/L)                                                    | 21.15 (17.28–23.55)                 | 19.20 (15.50–22.70)                   | 17.80 (15.25–22.40)                   | 18.60 (15.20–24.30)                       | 0.469    |
| GGT (U/L)                                                    | 17.05 (13.03–21.00) <sup>a</sup>    | 23.40 (15.30–39.70) <sup>b</sup>      | 15.70 (12.30–21.40) <sup>a</sup>      | 15.20 (10.63–21.80) <sup>a</sup>          | 0.009    |
| Creatinine ( $\mu\text{mol/L}$ )                             | 60.00 (52.00–69.50) <sup>a</sup>    | 56.00 (44.00–60.00) <sup>b</sup>      | 54.00 (44.88–61.25) <sup>b</sup>      | 49.00 (42.00–59.50) <sup>b</sup>          | 0.007    |
| Uric acid ( $\mu\text{mol/L}$ )                              | 306.50 (263.50–385.75) <sup>a</sup> | 279.00 (224.00–370.00) <sup>a,c</sup> | 221.00 (175.00–7–272.50) <sup>b</sup> | 263.00 (203.50–315.00) <sup>b,c</sup>     | 0.001    |
| <b>Autoantibodies</b>                                        |                                     |                                       |                                       |                                           |          |
| GADA positive (%)                                            | 0 (0) <sup>a</sup>                  | 0 (0) <sup>a</sup>                    | 30 (100) <sup>b</sup>                 | 18 (62.07) <sup>c</sup>                   | <0.001   |
| IA-2A positive (%)                                           | 0 (0) <sup>a</sup>                  | 0 (0) <sup>a</sup>                    | 13 (43.33) <sup>b</sup>               | 7 (24.14) <sup>b</sup>                    | <0.001   |
| Zn-T8 positive (%)                                           | 0 (0) <sup>a</sup>                  | 0 (0) <sup>a</sup>                    | 5 (16.67) <sup>b</sup>                | 5 (17.24) <sup>b</sup>                    | 0.003    |
| <b>Medication</b>                                            |                                     |                                       |                                       |                                           |          |
| 1. Insulin (%)                                               | 0 (0) <sup>a</sup>                  | 26 (83.87) <sup>b</sup>               | 27 (90.00) <sup>b,c</sup>             | 29 (100) <sup>c</sup>                     | <0.001   |
| 2. Acarbose (%)                                              | 0 (0)                               | 6 (19.35)                             | 3 (10.00)                             | 3 (10.34)                                 | 0.080    |
| 3. Metformin (%)                                             | 0 (0) <sup>a</sup>                  | 5 (16.13) <sup>a</sup>                | 10 (33.33) <sup>b</sup>               | 1 (3.45) <sup>a,b</sup>                   | <0.001   |
| 4. DDP4 inhibitors (%)                                       | 0(0) <sup>a</sup>                   | 5 (16.13) <sup>b</sup>                | 5 (16.67) <sup>b</sup>                | 0(0) <sup>a</sup>                         | 0.033    |
| 5. Aspirin (%)                                               | 0 (0)                               | 0 (0)                                 | 0 (0)                                 | 1 (3.45)                                  | 0.487    |
| 6. Lipid-lowering agents (%)                                 | 0 (0)                               | 4 (12.90)                             | 2 (6.67)                              | 2 (6.90)                                  | 0.267    |
| 7. Hypotensor (%)                                            | 0 (0)                               | 5 (16.13)                             | 2 (6.67)                              | 2 (6.90)                                  | 0.132    |
| 8. Levothyroxine (Euthyrox) (%)                              | 0 (0)                               | 0 (0)                                 | 3 (10.00)                             | 0 (0)                                     | 0.041    |
| <b>Defecation consistency (the Bristol stool form scale)</b> |                                     |                                       |                                       |                                           |          |
| Type 1—Separate, hard lumps (%)                              | 0 (0)                               | 2 (6.45)                              | 1 (3.33)                              | 2 (6.90)                                  | 0.717    |
| Type 2—Lumpy, sausage-shaped (%)                             | 1 (3.45)                            | 6 (19.35)                             | 2 (6.67)                              | 3 (10.34)                                 | 0.271    |

|                                       |            |            |            |            |       |
|---------------------------------------|------------|------------|------------|------------|-------|
| Type 3–Sausage-shaped with cracks (%) | 2 (6.90)   | 2 (6.45)   | 7 (23.33)  | 3 (10.34)  | 0.253 |
| Type 4–Smooth and soft (%)            | 19 (65.52) | 15 (48.39) | 13 (43.33) | 16 (55.17) | 0.073 |
| Type 5–Soft and edges (%)             | 2 (6.90)   | 4 (12.90)  | 4 (13.33)  | 1 (3.45)   | 0.579 |
| Type 6–Mushy with ragged edges (%)    | 0 (0)      | 0 (0)      | 2 (6.67)   | 1 (3.45)   | 0.504 |
| Type 7–Liquid (%)                     | 0 (0)      | 0 (0)      | 0 (0)      | 1 (3.45)   | 0.468 |

LADA, latent autoimmune diabetes in adults; RBC, red blood cells; WBC, white blood cells; ALT, alanine aminotransferase; AST, aspartate aminotransferase; GGT, gamma-glutamyl transferase; GADA, GAD antibody; IA-2A, insulinoma-associated protein-2 antibody; Zn-T8, zinc transporter-8; DDP4 inhibitors, dipeptidyl peptidase 4 inhibitors. Data are % (n) and median (25th–75th percentile). Superscript symbols (<sup>a</sup>, <sup>b</sup>, <sup>c</sup>) next to values in a row indicate that the medians of the different groups are significantly different ( $P<0.05$ )

**Supplementary Table 2—Clinical characteristics, autoantibodies, medication, and defecation**

| Variable                      | LADA patients (n = 30)              | T1D-A patients (n = 18)            | T1D-B patients (n = 11)          | <i>P</i> |
|-------------------------------|-------------------------------------|------------------------------------|----------------------------------|----------|
| Male/Female                   | 10/20                               | 10/8                               | 8/3                              |          |
| Age (years)                   | 36.5 (30.5–45)                      | 34 (30–46.25)                      | 39 (31–49)                       | 0.637    |
| Duration of diabetes (months) | 24 (2.5–36) <sup>a</sup>            | 36 (15.5–84) <sup>b</sup>          | 84 (1–120) <sup>b</sup>          | 0.026    |
| BMI (kg/m <sup>2</sup> )      | 20.48 (18.31–22.29) <sup>a</sup>    | 21.24 (19.93–22.39) <sup>a,b</sup> | 22.67 (22.43–23.43) <sup>b</sup> | 0.025    |
| WHR                           | 0.88 (0.82–0.94)                    | 0.88 (0.84–0.94)                   | 0.90 (0.86–0.93)                 | 0.879    |
| SBP (mmHg)                    | 110.5 (106–125.25)                  | 116 (108.75–127)                   | 121 (116–133)                    | 0.237    |
| DBP (mmHg)                    | 73 (64–80.5)                        | 76.5 (69.5–81)                     | 80 (70–84)                       | 0.396    |
| HbA1c (%)                     | 9.10 (7.08–11.80)                   | 8.85 (6.80–9.78)                   | 7.60 (6.50–8.90)                 | 0.176    |
| HbA1c (mmol/mol)              | 76 (54–105)                         | 73 (51–83)                         | 60 (48–74)                       | 0.176    |
| FPG (mmol/L)                  | 6.90 (6.00–8.15)                    | 6.40 (4.80–8.20)                   | 11.20 (6.90–11.42)               | 0.115    |
| OGTT-2h PG (mmol/L)           | 19.65 (16.68–23.42)                 | 22.30 (18.70–24.70)                | 21.40 (19.18–25.79)              | 0.289    |
| FCP (ng/mL)                   | 0.375 (0.255–0.496) <sup>a</sup>    | 0 (0–0.11) <sup>b</sup>            | 0 (0–0.01) <sup>b</sup>          | <0.001   |
| OGTT-2h PC (ng/mL)            | 1.12 (0.62–1.46) <sup>a</sup>       | 0.21 (0–0.34) <sup>b</sup>         | 0 (0–0.01) <sup>b</sup>          | <0.001   |
| AUC <sub>Glucose</sub>        | 50.59 (37.25–58.35)                 | 55.70 (49.66–69.90)                | 52.97 (45.21–71.78)              | 0.240    |
| AUC <sub>C-Peptide</sub>      | 173.20 (109.20–220.80) <sup>a</sup> | 35.31 (0–48.83) <sup>b</sup>       | 0 (0–1.05) <sup>b</sup>          | <0.001   |
| TC (mg/dL)                    | 4.34 (3.87–5.27)                    | 4.59 (4.09–5.57)                   | 4.37 (3.98–5.20)                 | 0.762    |
| TG (mg/dL)                    | 0.91 (0.62–1.43)                    | 0.89 (0.62–1.32)                   | 1.20 (0.87–1.66)                 | 0.222    |
| HDL-c (mg/dL)                 | 1.33 (1.10–1.62)                    | 1.43 (1.06–1.78)                   | 1.18 (1.06–1.35)                 | 0.430    |
| LDL-c (mg/dL)                 | 2.33 (1.85–3.04)                    | 2.40 (1.98–2.82)                   | 2.33 (2.07–2.92)                 | 0.899    |

**Inflammatory markers**

|                       |                                  |                                    |                                  |       |
|-----------------------|----------------------------------|------------------------------------|----------------------------------|-------|
| TNF- $\alpha$ (pg/mL) | 5.44 (4.60–9.74)                 | 5.01 (4.30–6.48)                   | 6.05 (4.16–6.74)                 | 0.628 |
| IL-6 (pg/mL)          | 1.61 (1.25–2.74)                 | 1.43 (1.16–2.81)                   | 2.08 (1.25–3.78)                 | 0.715 |
| IL-10 (pg/mL)         | 1.26 (1.11–2.05)                 | 1.32 (1.24–1.66)                   | 1.53 (1.23–1.76)                 | 0.682 |
| IL-1 $\beta$ (pg/mL)  | 2.67 (2.03–2.97)                 | 2.48 (2.03–3.18)                   | 2.47 (2.08–3.28)                 | 0.914 |
| LBP (ng/mL)           | 34.73 (29.48–39.89) <sup>a</sup> | 31.73 (27.81–35.87) <sup>a,b</sup> | 27.36 (25.89–31.01) <sup>b</sup> | 0.009 |

**Other biochemical tests**

|                            |                                     |                                     |                                     |       |
|----------------------------|-------------------------------------|-------------------------------------|-------------------------------------|-------|
| RBC ( $\times 10^{12}$ /L) | 4.56 (4.35–4.90)                    | 4.48 (4.36–4.93)                    | 4.36 (4.12–4.80)                    | 0.276 |
| Hemoglobin (g/L)           | 136.50 (126.00–149.00)              | 137.50 (129.00–147.00)              | 128.00 (118.00–147.00)              | 0.444 |
| WBC ( $\times 10^9$ /L)    | 5.01 (4.41–6.47) <sup>a</sup>       | 6.43(5.20–7.69) <sup>b</sup>        | 5.56(5.19–7.70) <sup>a,b</sup>      | 0.038 |
| ALT (U/L)                  | 17.00 (13.25–20.55)                 | 14.45 (12.57–21.00)                 | 17.60 (10.35–25.17)                 | 0.64  |
| AST (U/L)                  | 17.85 (15.60–22.80)                 | 19.25 (15.42–24.55)                 | 17.00 (14.80–24.20)                 | 0.885 |
| GGT (U/L)                  | 15.70 (12.30–21.40)                 | 14.90 (10.68–19.55)                 | 16.15 (9.95–34.88)                  | 0.708 |
| Creatinine (mmol/L)        | 54.00 (44.88–61.25)                 | 48.00 (41.50–56.25)                 | 49.00 (42.00–66.00)                 | 0.647 |
| Uric acid ( $\mu$ mol/L)   | 221.00 (175.00–272.50) <sup>a</sup> | 224.50 (193.50–275.25) <sup>a</sup> | 311.00 (263.00–326.00) <sup>b</sup> | 0.027 |

**Autoantibodies**

|                    |                         |                        |                    |        |
|--------------------|-------------------------|------------------------|--------------------|--------|
| GADA positive (%)  | 30 (100) <sup>a</sup>   | 18 (100) <sup>a</sup>  | 0 (0) <sup>b</sup> | <0.001 |
| IA-2A positive (%) | 13 (43.33) <sup>a</sup> | 7 (38.89) <sup>a</sup> | 0 (0) <sup>b</sup> | 0.032  |
| Zn-T8 positive (%) | 5 (16.67)               | 5 (27.78)              | 0 (0)              | 0.159  |

**Medication**

|                 |            |           |          |       |
|-----------------|------------|-----------|----------|-------|
| 1. Insulin (%)  | 27 (90.00) | 18 (100)  | 11 (100) | 0.399 |
| 2. Acarbose (%) | 3 (10.00)  | 2 (11.11) | 1 (9.09) | 0.896 |

|                                 |            |           |       |       |
|---------------------------------|------------|-----------|-------|-------|
| 3. Metformin (%)                | 10 (33.33) | 1 (5.56)  | 0 (0) | 0.081 |
| 4. DDP4 inhibitors (%)          | 5 (16.67)  | 1 (5.56)  | 0 (0) | 0.22  |
| 5. Aspirin (%)                  | 0 (0)      | 1 (5.56)  | 0 (0) |       |
| 6. Lipid-lowering agents (%)    | 2 (6.67)   | 2 (11.11) | 0 (0) |       |
| 7. Hypotensor (%)               | 2 (6.67)   | 2 (11.11) | 0 (0) |       |
| 8. Levothyroxine (Euthyrox) (%) | 3 (10.00)  | 0 (0)     | 0 (0) |       |

**Defecation consistency (the Bristol stool form scale)**

|                                       |            |           |           |       |
|---------------------------------------|------------|-----------|-----------|-------|
| Type 1 Separate, hard lumps (%)       | 1 (3.33)   | 1 (5.56)  | 1 (9.09)  | 0.476 |
| Type 2 Lumpy, sausage-shaped (%)      | 2 (6.67)   | 3 (16.67) | 0 (0)     | 0.279 |
| Type 3 Sausage-shaped with cracks (%) | 7 (23.33)  | 3 (16.67) | 0 (0)     | 0.107 |
| Type 4 Smooth and soft (%)            | 13 (43.33) | 9 (50)    | 7 (63.64) | 0.208 |
| Type 5 Soft and edges (%)             | 4 (13.33)  | 1 (5.56)  | 0 (0)     | 0.279 |
| Type 6 Mushy with ragged edges (%)    | 2 (6.67)   | 0 (0)     | 1 (9.09)  | 0.476 |
| Type 7 Liquid (%)                     | 0 (0)      | 0 (0)     | 1 (9.09)  | 0.032 |

LADA, latent autoimmune diabetes in adults; T1D-A, type 1 diabetes-A (GADA positive); T1DB, type 1 diabetes-B (GADA negative). WHR, waist-hip ratio; SBP, systolic blood pressure; DBP, diastolic blood pressure; OGTT, oral glucose tolerance test; OGTT 2h PG, OGTT 2h postprandial glucose; FCP, fasting C-peptide; OGTT 2h CP, OGTT 2h postprandial c-peptide; AUC<sub>Glucose</sub>, areas under the receiver operating characteristic curves for glucose during OGTT; AUC<sub>C-peptide</sub>, areas under the receiver operating characteristic curves for C-peptide during

OGTT; TC, total cholesterol; TG, triglyceride; HDL-c, high-density lipoprotein; LDL-c, low-density lipoprotein; IL, interleukin; TNF- $\alpha$ , tumor necrosis factor- $\alpha$ ; LBP, lipopolysaccharide-binding protein; RBC, red blood cells; WBC, white blood cells; ALT, alanine aminotransferase; AST, aspartate aminotransferase; GGT, gamma-glutamyl transferase; GADA, GAD antibodies; IA-2A, insulinoma-associated protein-2 antibody; Zn-T8, zinc transporter-8; DDP4 inhibitors, dipeptidyl peptidase 4 inhibitors. Data are % (n) and median (25th–75th percentile). Different superscript symbols (<sup>a</sup>, <sup>b</sup>) next to values in a row indicate that the means of the different groups are significantly different ( $P < 0.05$ ).

**Supplementary Table 3—Clinical characteristics, autoantibodies, medication, and defecation**

| Variable                      | GAD-P patients (n=48)            | GAD-N patients (n=11)              | T2D patients (n=31)              | Healthy controls (n=29)            | P      |
|-------------------------------|----------------------------------|------------------------------------|----------------------------------|------------------------------------|--------|
| Male/Female                   | 20/28                            | 8/3                                | 11/20                            | 11/18                              |        |
| Age (years)                   | 35 (31-45)                       | 39 (31-49)                         | 39 (31-48)                       | 34 (28.5-52.5)                     | 0.897  |
| Duration of diabetes (months) | 24 (4.5-48)                      | 84 (1-120)                         | 36 (12-84)                       |                                    | 0.18   |
| BMI (kg/m <sup>2</sup> )      | 20.74 (18.38-22.20) <sup>a</sup> | 22.67 (22.43-23.43) <sup>a,b</sup> | 23.51 (21.22-25.40) <sup>b</sup> | 22.14 (19.99-24.41) <sup>a,b</sup> | <0.001 |
| WHR                           | 0.88 (0.83-0.93)                 | 0.90 (0.86-0.93)                   | 0.92 (0.87-0.94)                 | 0.86 (0.83-0.92)                   | 0.235  |
| SBP (mmHg)                    | 114 (106-125.75)                 | 121 (116-133)                      | 120 (110-130)                    | 112 (106-120.5)                    | 0.122  |
| DBP (mmHg)                    | 75 (66.25-80)                    | 80 (70-84)                         | 76 (72-80)                       | 71 (65-77)                         | 0.105  |
| HbA1c (%)                     | 8.95 (7.03-10.78) <sup>a</sup>   | 7.60 (6.50-8.90) <sup>a</sup>      | 9.00 (7.00-10.06) <sup>a</sup>   | 5.30 (5.20-5.50) <sup>b</sup>      | <0.001 |
| HbA1c (mmol/mol)              | 74 (53-94) <sup>a</sup>          | 60 (48-74) <sup>a</sup>            | 75 (53-86) <sup>a</sup>          | 34 (33-37) <sup>b</sup>            | <0.001 |
| FPG (mmol/L)                  | 6.80 (5.70-8.15) <sup>a</sup>    | 11.20 (6.90-11.42) <sup>a</sup>    | 7.15 (6.28-10.25) <sup>a</sup>   | 4.85 (4.43-5.28) <sup>b</sup>      | <0.001 |
| OGTT-2h PG (mmol/L)           | 21.56 (16.90-23.70) <sup>a</sup> | 21.40 (19.18-25.79) <sup>a</sup>   | 17.10 (13.75-19.33) <sup>a</sup> | 6.15 (5.50-6.90) <sup>b</sup>      | <0.001 |
| FCP (ng/mL)                   | 0.25 (0.08-0.47) <sup>a</sup>    | 0 (0-0.01) <sup>a</sup>            | 0.78 (0.50-1.26) <sup>b</sup>    | 1.08 (0.86-1.36) <sup>b</sup>      | <0.001 |
| OGTT-2h PC (ng/mL)            | 0.64 (0.32-1.32) <sup>a</sup>    | 0 (0-0.01) <sup>a</sup>            | 2.99 (2.10-4.70) <sup>b</sup>    | 5.58 (4.11-7.73) <sup>b</sup>      | <0.001 |
| AUC <sub>Glucose</sub>        | 52.93 (43.70-59.00) <sup>a</sup> | 52.97 (45.21-71.78) <sup>a</sup>   | 44.82 (40.79-49.76) <sup>a</sup> | 20.68 (19.60-21.91) <sup>b</sup>   | <0.001 |

|                            |                                  |                                    |                                     |                                      |        |
|----------------------------|----------------------------------|------------------------------------|-------------------------------------|--------------------------------------|--------|
| AUC C-Peptide              | 105 (41.33-199.28) <sup>a</sup>  | 0 (0-1.05) <sup>a</sup>            | 426.85 (287.28-597.63) <sup>b</sup> | 875.90 (743.70-1112.50) <sup>c</sup> | <0.001 |
| TC (mg/dL)                 | 4.46 (4.04-5.40)                 | 4.37 (3.98-5.20)                   | 4.90 (3.68-5.33)                    | 4.57 (4.12-4.89)                     | 0.723  |
| TG (mg/dL)                 | 0.89 (0.62-1.39) <sup>a</sup>    | 1.20 (0.87-1.66) <sup>a,b</sup>    | 1.35 (0.97-2.12) <sup>b</sup>       | 1.08 (0.89-1.21) <sup>a,b</sup>      | 0.015  |
| HDL-c (mg/dL)              | 1.38 (1.09-1.65) <sup>a</sup>    | 1.18 (1.06-1.35) <sup>a,b</sup>    | 1.15 (0.94-1.27) <sup>b</sup>       | 1.36 (1.26-1.56) <sup>a</sup>        | 0.002  |
| LDL-c (mg/dL)              | 2.37 (1.94-2.86)                 | 2.33 (2.07-2.92)                   | 2.99 (2.16-3.27)                    | 2.56 (2.38-2.78)                     | 0.185  |
| Inflammatory markers       |                                  |                                    |                                     |                                      |        |
| TNF- $\alpha$ (pg/mL)      | 5.41 (4.48-6.49) <sup>a</sup>    | 6.05 (4.16-6.74) <sup>a,b</sup>    | 5.60 (5.16-6.28) <sup>a</sup>       | 4.49 (4.06-5.09) <sup>b</sup>        | 0.002  |
| IL-6 (pg/mL)               | 1.55 (1.19-2.69) <sup>a</sup>    | 2.08 (1.25-3.78) <sup>a</sup>      | 2.69 (1.55-5.68) <sup>a</sup>       | 1.09 (0.92-1.27) <sup>b</sup>        | <0.001 |
| IL-10 (pg/mL)              | 1.26 (1.11-2.05) <sup>a</sup>    | 1.32 (1.03-1.48) <sup>a,b</sup>    | 1.44 (1.21-1.66) <sup>a,b</sup>     | 1.63 (1.24-1.84) <sup>b</sup>        | 0.007  |
| IL-1 $\beta$ (pg/mL)       | 2.64 (2.03-2.97) <sup>a,b</sup>  | 2.47 (2.08-3.28) <sup>a,b</sup>    | 3.03 (2.47-3.77) <sup>a</sup>       | 2.19 (2.03-2.64) <sup>b</sup>        | <0.001 |
| LBP (ng/mL)                | 33.41 (28.73-38.02) <sup>a</sup> | 27.36 (25.89-31.01) <sup>a,b</sup> | 32.91 (29.41-36.50) <sup>a</sup>    | 26.35 (23.58-29.24) <sup>b</sup>     | <0.001 |
| Other biochemical markers  |                                  |                                    |                                     |                                      |        |
| RBC ( $\times 10^{12}$ /L) | 4.52 (4.37-4.89)                 | 4.36 (4.12-4.80)                   | 4.72 (4.46-4.98)                    | 4.70 (4.30-4.98)                     | 0.207  |
| Hemoglobin (g/L)           | 136.50 (127.25-149)              | 128 (118-147)                      | 144 (132-149)                       | 144 (127.5-152.5)                    | 0.356  |
| WBC ( $\times 10^9$ /L)    | 5.60 (4.64-6.82)                 | 5.56 (5.19-7.70)                   | 7.00 (5.47-7.85)                    | 5.70 (4.68-6.40)                     | 0.053  |
| ALT (U/L)                  | 16.70 (12.70-20.10)              | 17.60 (10.35-25.17)                | 19.00 (14.10-30.01)                 | 16.8 (12.8-21.6)                     | 0.320  |
| AST (U/L)                  | 18.25 (15.48-23.15)              | 17.00 (14.80-24.20)                | 19.20 (15.50-22.70)                 | 21.15 (17.28-23.55)                  | 0.449  |
| GGT (U/L)                  | 15.40 (11.10-21.20) <sup>a</sup> | 16.15 (9.95-34.88) <sup>a,b</sup>  | 23.40 (15.30-39.70) <sup>b</sup>    | 17.05 (13.03-21.00) <sup>a,b</sup>   | 0.007  |
| Creatinine (mmol/L)        | 51 (44.12-60.75) <sup>a</sup>    | 49 (42-66) <sup>a,b</sup>          | 56 (44-58) <sup>a,b</sup>           | 60 (52-69.5) <sup>b</sup>            | 0.009  |

|                                                       |                            |                              |                              |                                   |        |
|-------------------------------------------------------|----------------------------|------------------------------|------------------------------|-----------------------------------|--------|
| Uric Acid (μmol/L)                                    | 224 (177-275) <sup>a</sup> | 311 (263-326) <sup>a,b</sup> | 279 (224-370) <sup>a,b</sup> | 306.5 (263.5-385.75) <sup>b</sup> | <0.001 |
| Autoantibodies                                        |                            |                              |                              |                                   |        |
| GADA positive (%)                                     | 48 (100) <sup>a</sup>      | 0 (0) <sup>b</sup>           | 0 (0) <sup>b</sup>           | 0 (0) <sup>b</sup>                | <0.001 |
| IA-2A positive (%)                                    | 20 (41.67)                 | 0 (0)                        | 0 (0)                        | 0 (0)                             |        |
| Zn-T8 positive (%)                                    | 10 (20.83)                 | 0 (0)                        | 0 (0)                        | 0 (0)                             |        |
| Medication                                            |                            |                              |                              |                                   |        |
| 1. Insulin (%)                                        | 45 (93.75)                 | 11 (100)                     | 26 (83.87)                   | 0 (0)                             |        |
| 2. Acarbose (%)                                       | 5 (10.42)                  | 1 (9.09)                     | 6 (19.35)                    | 0 (0)                             |        |
| 3. Metformin (%)                                      | 11 (22.92)                 | 0 (0)                        | 5 (16.13)                    | 0 (0)                             |        |
| 4. DDP4 inhibitors (%)                                | 6 (12.50)                  | 0 (0)                        | 5 (16.13)                    | 0 (0)                             |        |
| 5. Aspirin (%)                                        | 1 (2.08)                   | 0 (0)                        | 0 (0)                        | 0 (0)                             |        |
| 6. Lipid-lowering agents (%)                          | 4 (8.33)                   | 0 (0)                        | 4 (12.90)                    | 0 (0)                             |        |
| 7. Hypotensor (%)                                     | 4 (8.33)                   | 0 (0)                        | 5 (16.13)                    | 0 (0)                             |        |
| 8. Levothyroxine (Euthyrox) (%)                       | 3 (6.25)                   | 0 (0)                        | 0 (0)                        | 0 (0)                             |        |
| Defecation consistency (The Bristol Stool Form Scale) |                            |                              |                              |                                   |        |
| Type 1 Separate, hard lumps (%)                       | 2 (4.16)                   | 1 (9.09)                     | 2 (6.45)                     | 0 (0)                             |        |
| Type 2 Lumpy, sausage-shaped (%)                      | 5 (10.42)                  | 0 (0)                        | 6 (19.35)                    | 1 (3.45)                          | /      |
| Type 3 Sausage-shaped with crack (%)                  | 10 (20.83)                 | 0 (0)                        | 2 (6.45)                     | 2 (6.90)                          | /      |



|                                    |            |           |            |            |
|------------------------------------|------------|-----------|------------|------------|
| Type 4 Smooth and soft (%)         | 22 (45.83) | 7 (63.64) | 15 (48.39) | 19 (65.52) |
| Type 5 Soft and edges (%)          | 5 (10.42)  | 0 (0)     | 4 (12.90)  | 2 (6.90)   |
| Type 6 Mushy with ragged edges (%) | 2 (4.16)   | 1 (9.09)  | 0 (0)      | 0 (0)      |
| Type 7 Liquid (%)                  | 0 (0)      | 1 (9.09)  | 0 (0)      | 0 (0)      |

---

LADA, latent autoimmune diabetes in adults; T1D-A, GADA-P (GADA-positive); GADA-P (GADA-negative); T2D, type 2 diabetes; WHR, waist-hip ratio; SBP, systolic blood pressure; DBP, diastolic blood pressure; OGTT, oral glucose tolerance test; OGTT 2h PG, OGTT 2h postprandial glucose; FCP, fasting C-peptide; OGTT 2h CP, OGTT 2h postprandial c-peptide; AUC<sub>Glucose</sub>, areas under the receiver operating characteristic curves for glucose during OGTT; AUC<sub>C-peptide</sub>, areas under the receiver operating characteristic curves for C-peptide during OGTT; TC, total cholesterol; TG, triglyceride; HDL-c, high-density lipoprotein; LDL-c, low-density lipoprotein; IL, interleukin; TNF- $\alpha$ , tumor necrosis factor- $\alpha$ ; LBP, lipopolysaccharide-binding protein; RBC, red blood cells; WBC, white blood cells; ALT, alanine aminotransferase; AST, aspartate aminotransferase; GGT, gamma-glutamyl transferase; GADA, GAD antibodies; IA-2A, insulinoma-associated protein-2 antibody; Zn-T8, zinc transporter-8; DDP4 inhibitors, dipeptidyl peptidase 4 inhibitors. Data are % (n) and median (25th–75th percentile). Different superscript symbols (<sup>a</sup>, <sup>b</sup>, <sup>c</sup>) next to values in a row indicate that the means of the different groups are significantly different (P<0.05).

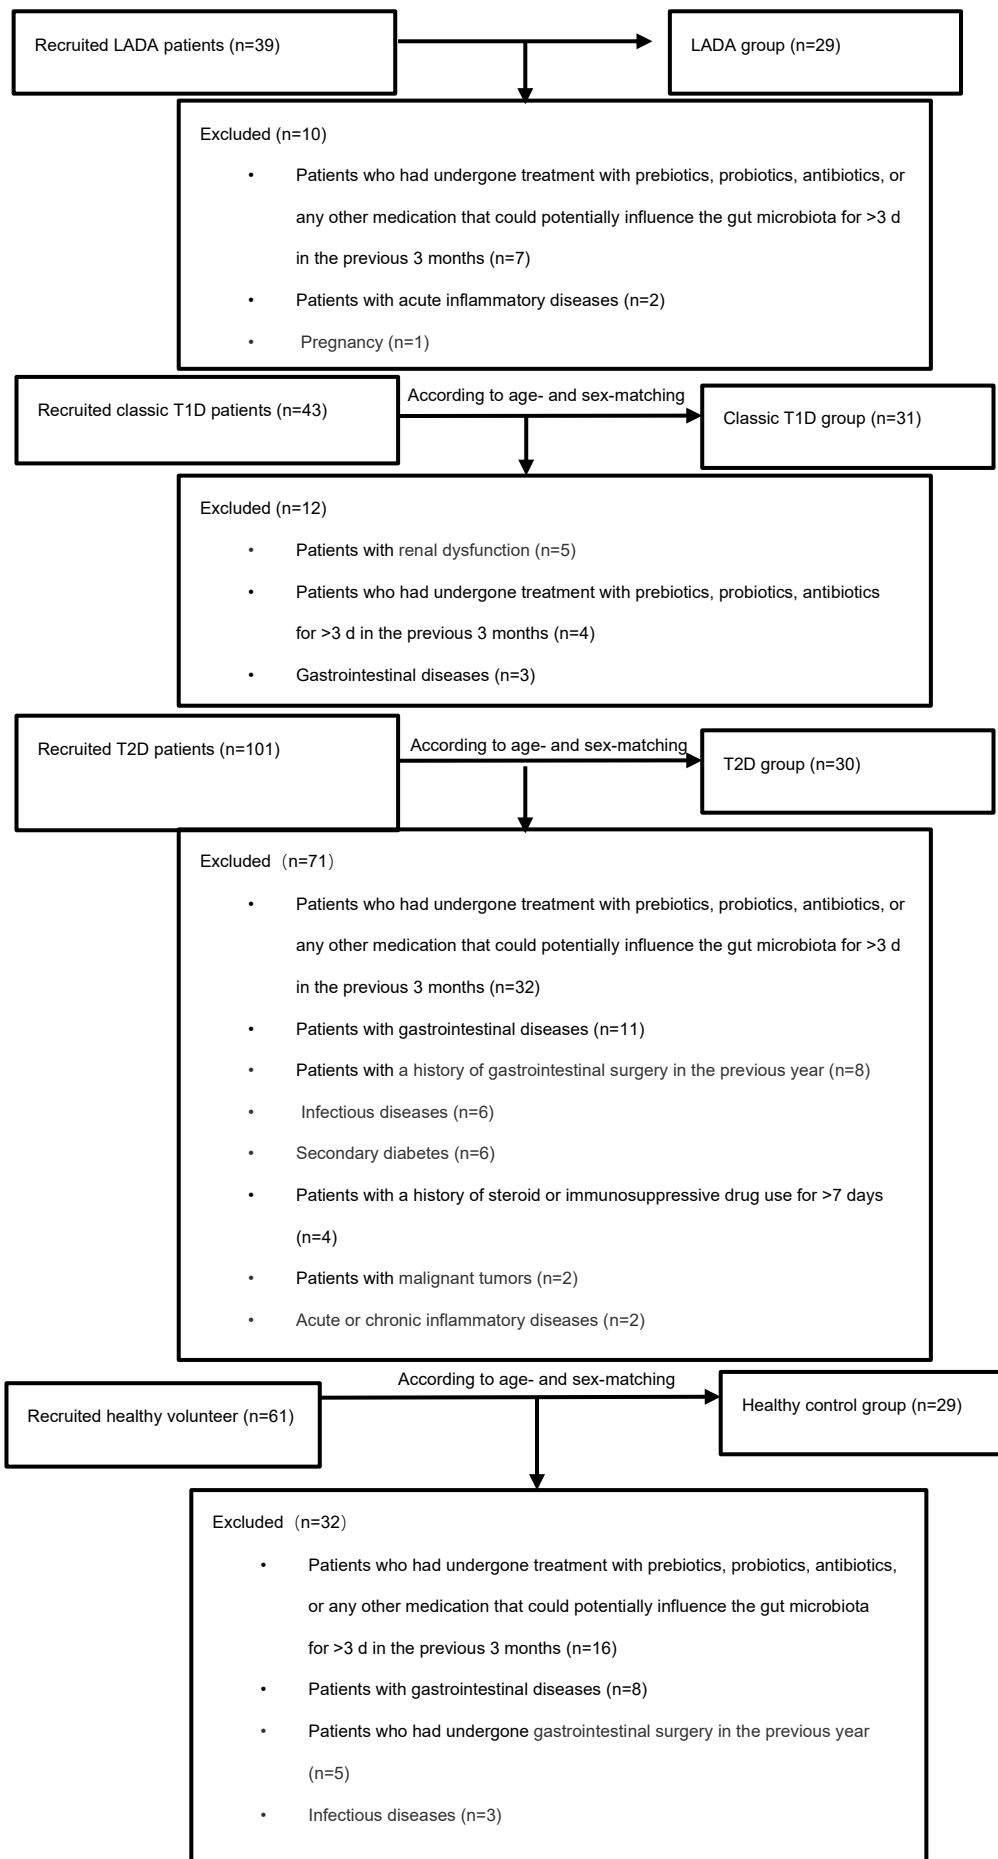

**Supplementary Diagram 1**—Schematic diagram of patients included and excluded. LALA, latent autoimmune diabetes in adults; T1D, type 1 diabetes; T2D, type 2 diabetes.

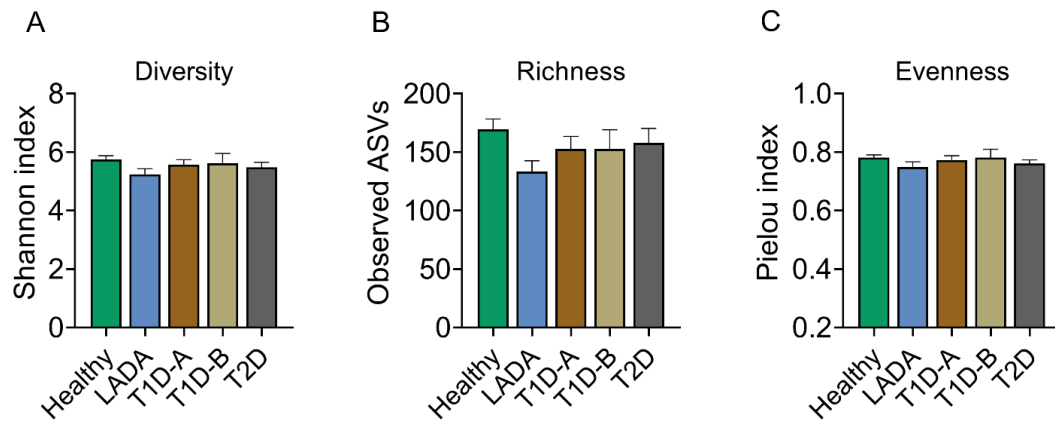

**Supplementary Figure 1**—Comparison of  $\alpha$ -diversity (A, Diversity; B, Richness and C, Evenness) between the healthy subjects, latent autoimmune diabetes in adults (LADA), type 1 diabetes-A (T1D-A; GADA-positive), type 1 diabetes-B (T1D-B; GADA-negative) and type 2 diabetes (T2D) groups. Comparisons were performed using the Kruskal-Wallis test with Dunn's post-hoc analysis, for significant differences, the *P*-value was controlled at 0.05.

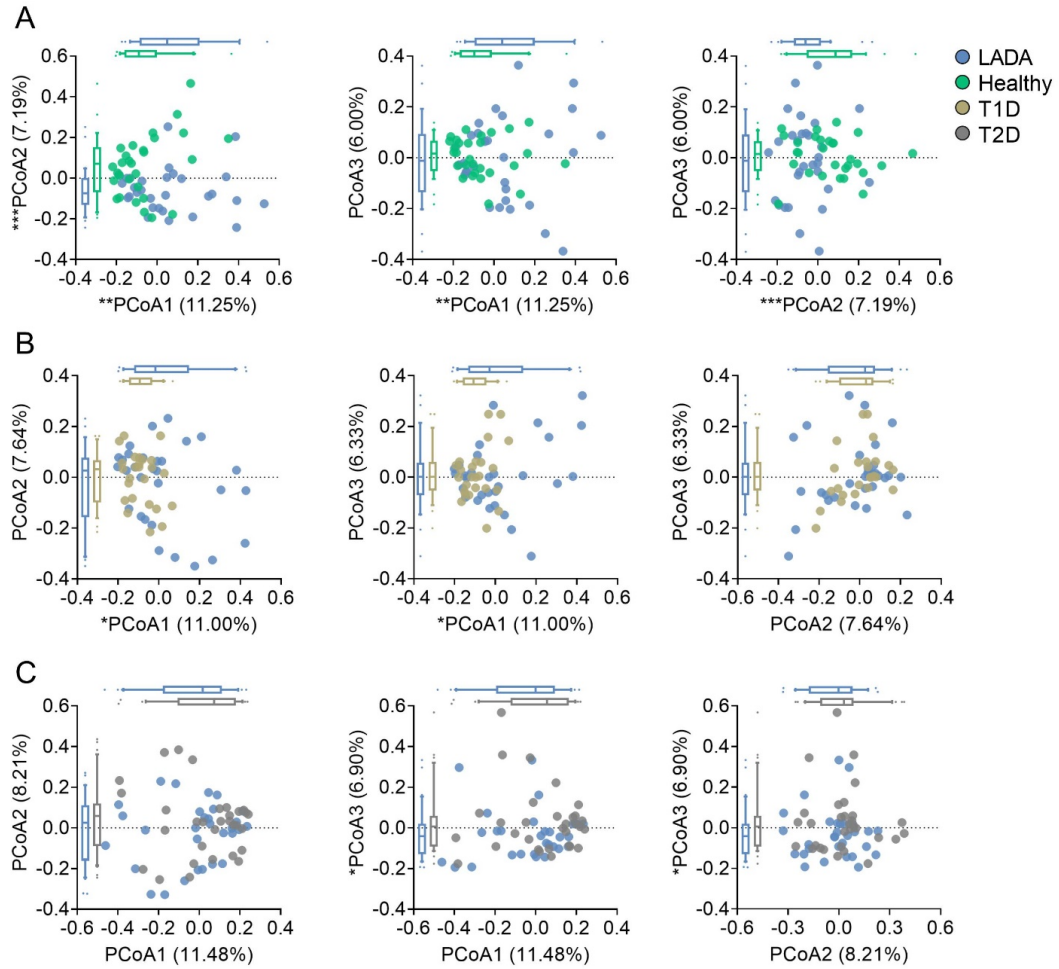

**Supplementary Figure 2**—Comparison of the gut microbiota between patients with latent autoimmune diabetes in adults (LADA) and healthy subjects and patients with classic type 1 diabetes (T1D) and type 2 diabetes (T2D) patients. Principal coordinates analysis (PCoA) of the LADA and healthy groups (A), LADA and T1D groups (B), LADA and T2D groups (C) on the first three principle coordinates performed based on the Bray-Curtis distance. The PCoA scores of the gut microbiota between the LADA and healthy groups, LADA and T1D groups, LADA and T2D groups on the PCoA1, PCoA2, and PCoA3 were tested using the Mann-Whitney U; for significant differences, the *P*-value was controlled at 0.05.

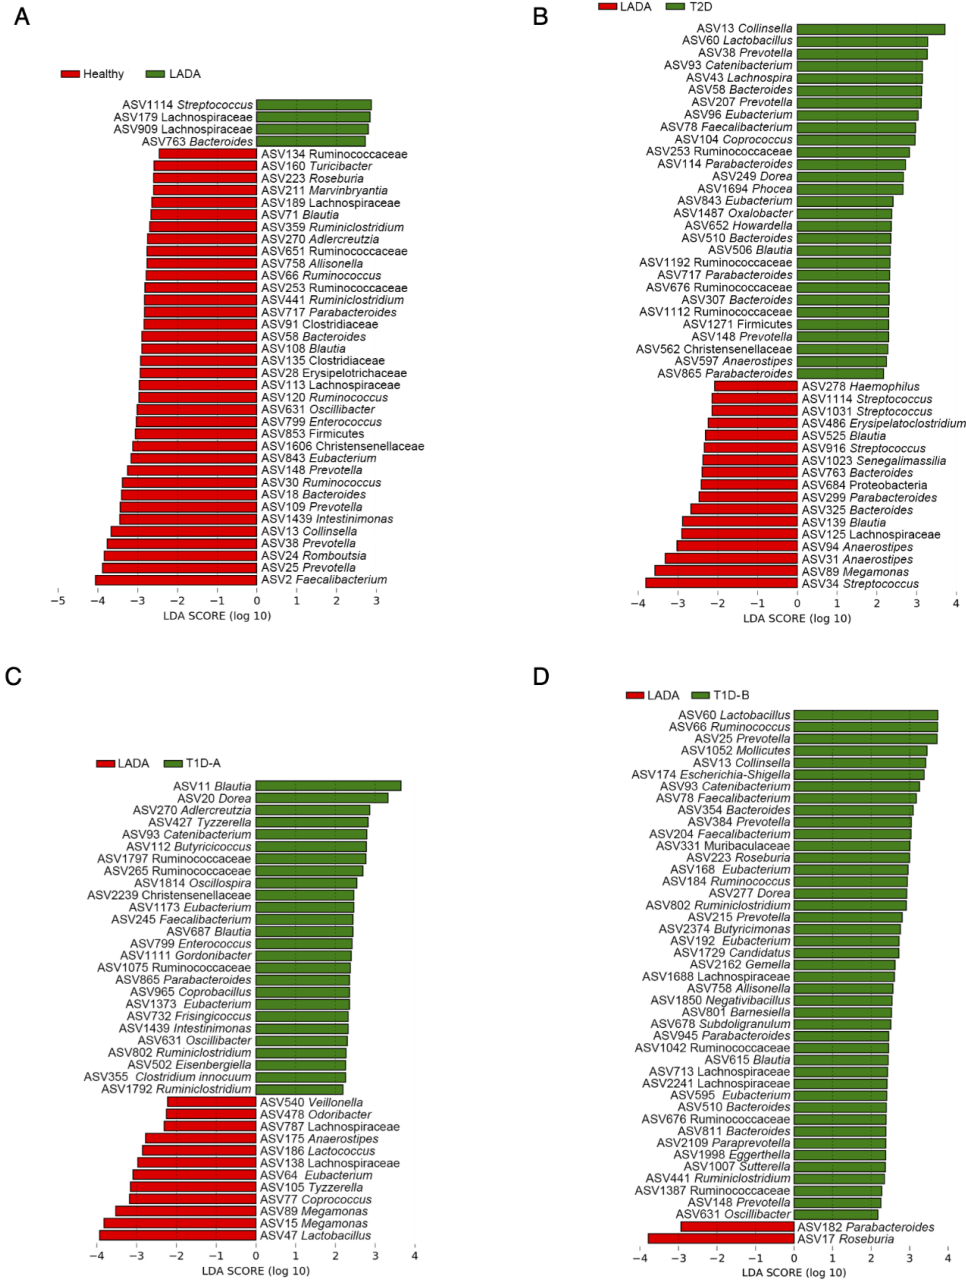

**Supplementary Figure 3**—Identification of major amplicon sequence variants (ASVs) contributing to the differences in the gut microbiota of patients with latent autoimmune diabetes in adults (LADA) with other cohorts using LefSe. (A) ASVs contributing to the differences between the LADA and healthy groups. (B) ASVs contributing to the differences between the LADA and type 2 diabetes (T2D) groups. (C) ASVs contributing to the differences between the LADA and type 1 diabetes-A (T1D-A; GADA-positive) groups. (D) ASVs contributing to the differences between the LADA and type 1 diabetes-B (T1D-B; GADA-negative) groups.

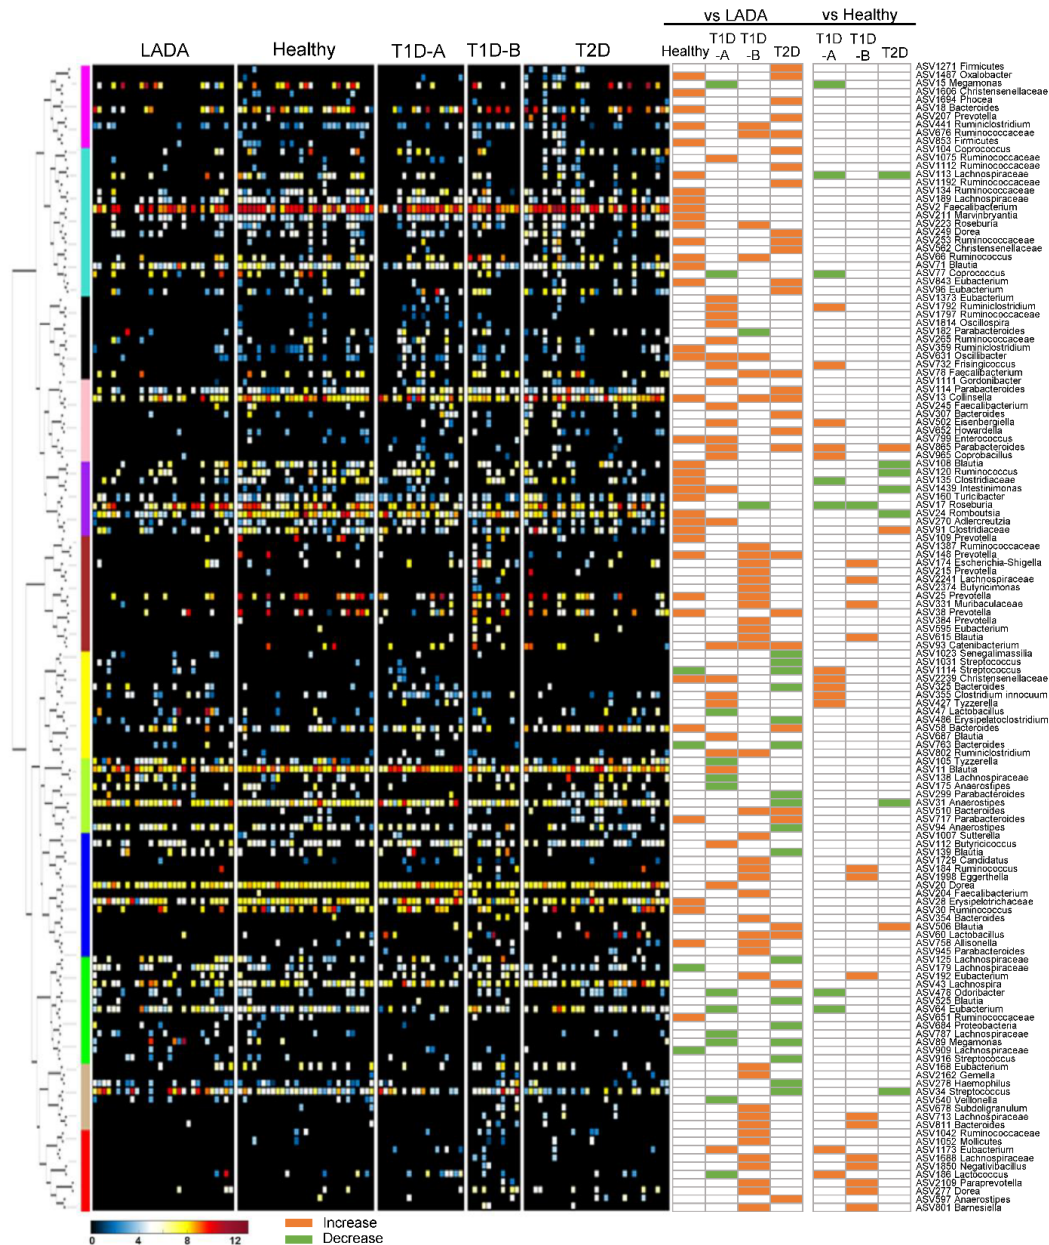

**Supplementary Figure 4**—Distribution of 139 amplicon sequence variants (ASVs) contributing to the differences in the gut microbiota of patients with latent autoimmune diabetes in adults (LADA) with cohorts among the four other groups, i.e., healthy; T1D-A, type 1 diabetes-A (GADA-positive); T1D-B, type 1 diabetes-B (GADA-negative); and T2D, type 2 diabetes. The color bar (left hand side) represents the 12 co-abundance groups (CAGs) clustered among the 139 ASVs based on their Spearman correlations.



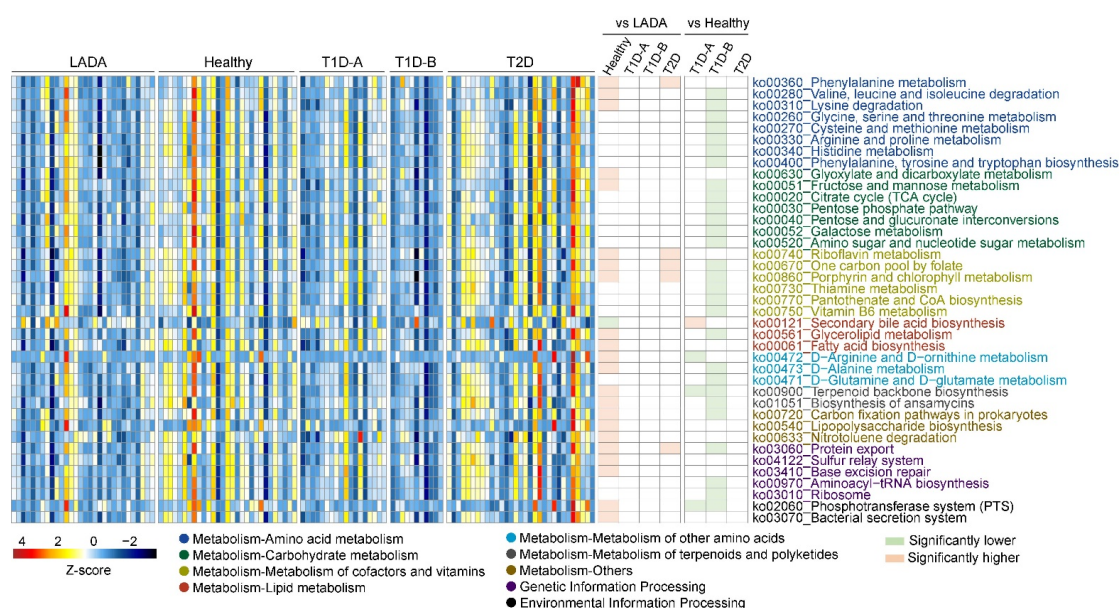

**Supplementary Figure 5**—Heatmap of the different predicted KEGG metabolic pathways of gut microbiota between latent autoimmune diabetes in adults (LADA), healthy, type 1 diabetes-A (T1D-A, GADA-positive), type 1 diabetes-B (T1D-B, GADA-negative), and type 2 diabetes (T2D) groups. Comparisons of the abundance of each pathway between LADA, healthy, T1D-A, T1D-B, and T2D groups were performed using the Wilcoxon rank-sum test; significant differences had *P*-value that was controlled at 0.05.

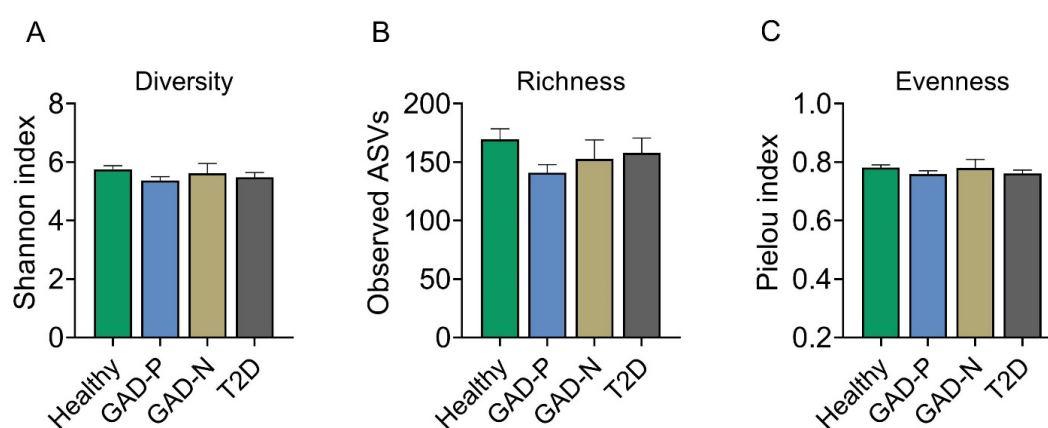

**Supplementary Figure 6**—Comparison of  $\alpha$ -diversity (A, Diversity; B, Richness and C, Evenness) between the healthy subjects, GADA-positive (GADA-P), GADA-negative (GADA-N), and type 2 diabetes (T2D) groups. Comparisons were performed using the Kruskal-Wallis test with Dunn's post-hoc analysis, for significant differences, the *P*-value was controlled at 0.05.

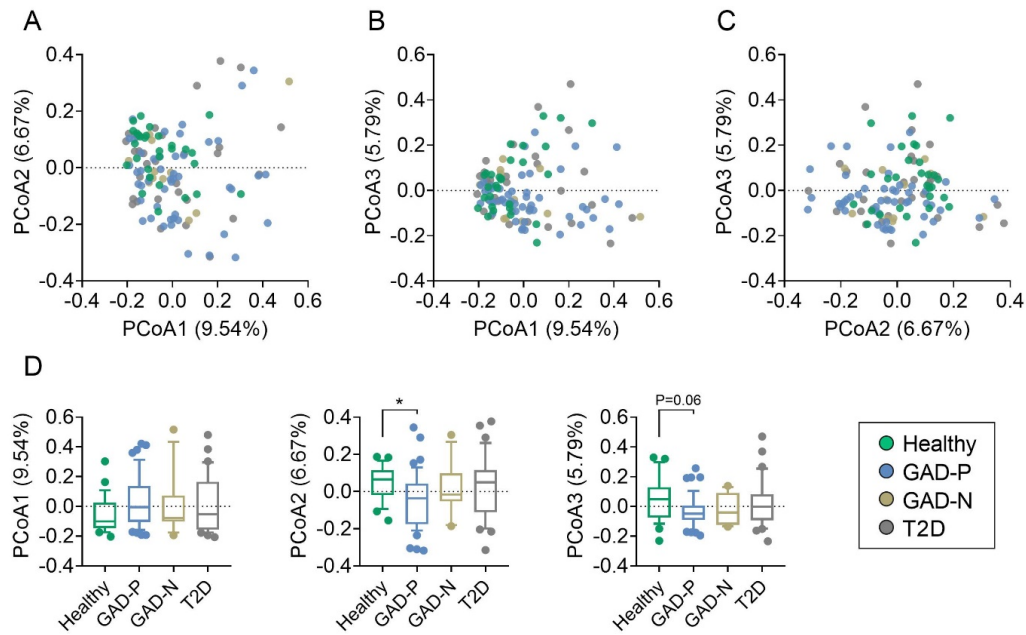

**Supplementary Figure 7**—Comparison of the gut microbiota between healthy, GADA-positive (GADA-P), GADA-negative (GADA-N), and type 2 diabetes (T2D) groups. Principal coordinates analysis (PCoA) of the four groups on the first three principle coordinates was performed based on the Bray Curtis distance. Comparisons were performed using the Kruskal-Wallis test with Dunn’s post-hoc analysis, for significant differences, the  $*P < 0.05$ .

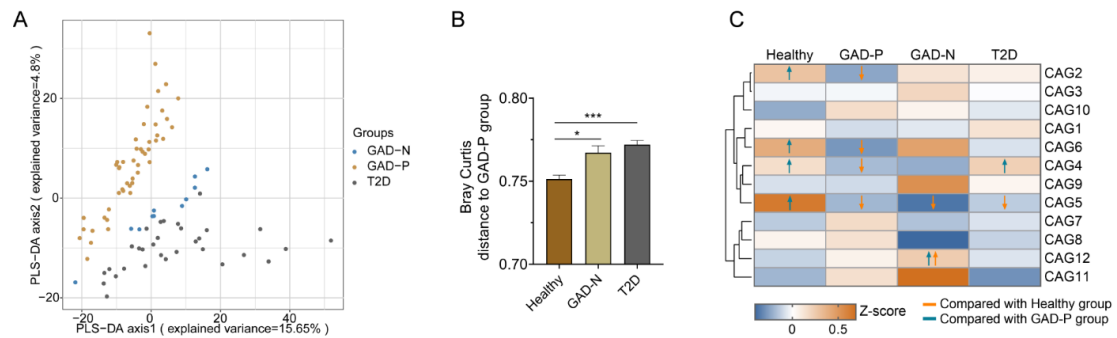

**Supplementary Figure 8**—Comparison of the gut microbiota between healthy, GADA-positive (GADA-P), GADA-negative (GADA-N), and type 2 diabetes (T2D) groups. A, PLS-DA of the gut microbiota composition of GADA-P, GADA-N, and T2D groups. B, Comparison of the between-sample Bray Curtis distances of the gut microbiota of healthy, GADA-N, T2D groups to the GADA-P group. C, Relative abundance of 12 CAGs across different groups. The abundance profiles were transformed into Z scores by subtracting the average abundance and dividing the standard deviations of all the samples. The Z score was negative (shown in blue) when the row abundance was lower than the mean. Comparisons among the relative abundance of each CAG among 5 groups were performed using the Kruskal-Wallis test with Dunn’s multiple comparisons test, the significant differences ( $P$ -value controlled



at 0.05) were marked with arrows, upward-facing arrow represents significantly higher values compared to those in the corresponding group, and downward-facing arrow represents significantly lower values compared to those in the corresponding group.

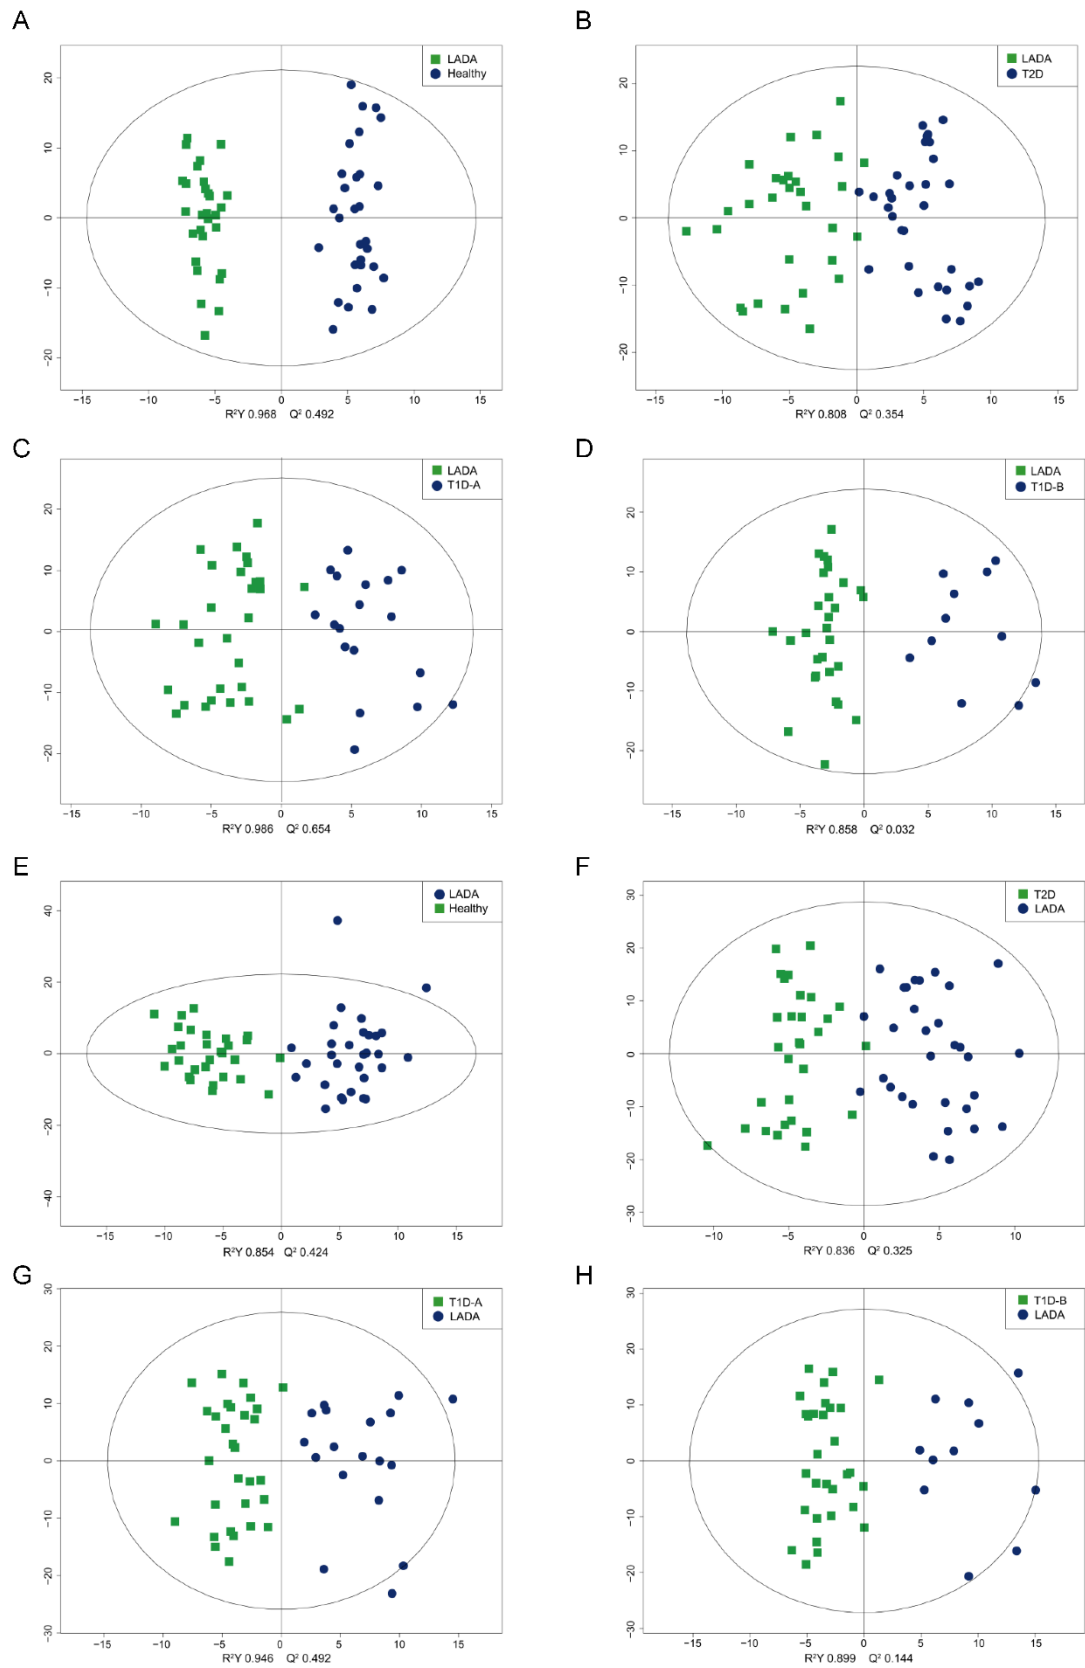

**Supplementary Figure 9**—Orthogonal projection to latent structure-discriminant analysis (OPLS-DA) score plots of fecal metabolites. (A–D) Comparisons in the

negative ion mode. (E–H) Comparisons under the positive ionic mode. Abbreviations: LADA, latent autoimmune diabetes in adults; T1D-A, type 1 diabetes-A (GADA-positive); T1D-B, type 1 diabetes-B (GADA-negative); T2D, type 2 diabetes.

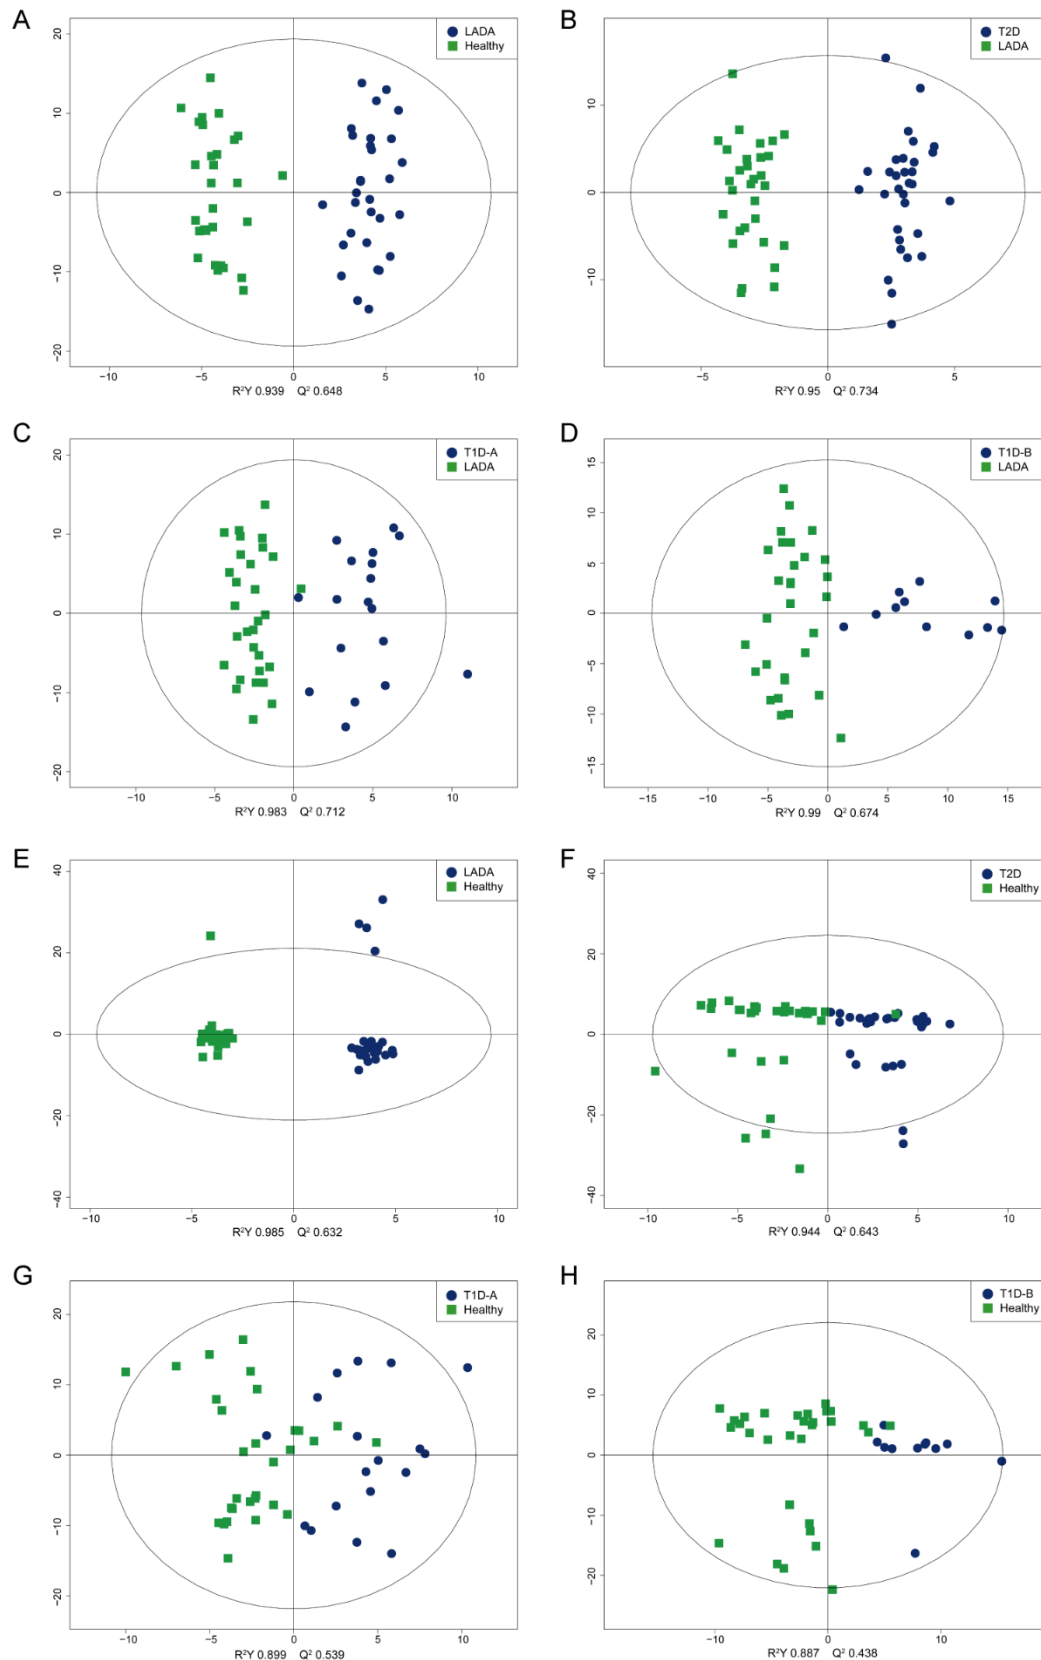

**Supplementary Figure 10**—Orthogonal projection to latent structure-discriminant analysis (OPLS-DA) score plots of serum metabolites. (A–D) Comparisons in the negative ion mode. (E–H) Comparisons in the positive ion mode. Abbreviations: LADA, latent autoimmune diabetes in adults; T1D-A, type 1 diabetes-A (GADA-positive); T1D-B, type 1 diabetes-B (GADA-negative); T2D, type 2 diabetes.

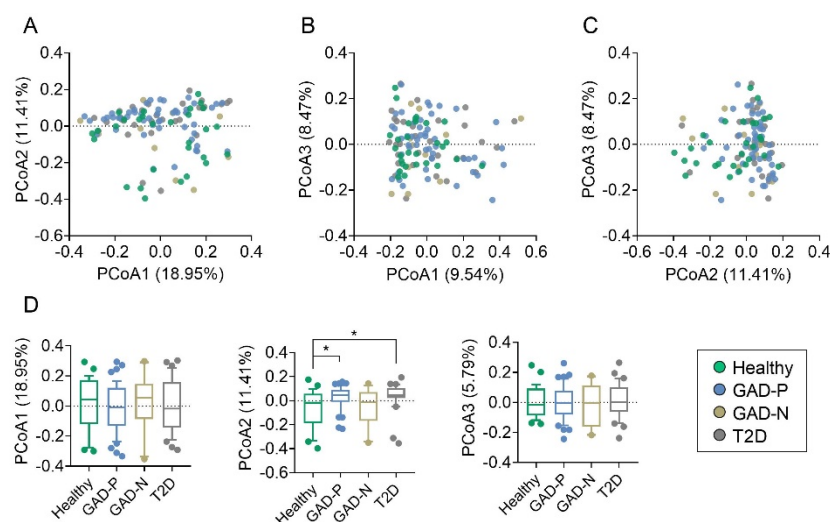

**Supplementary Figure 11**—Comparison of the fecal metabolites detected in the negative ion mode between healthy, GADA-positive (GADA-P), GADA-negative (GADA-N), and type 2 diabetes (T2D) groups. Comparisons were performed using the Kruskal-Wallis test with Dunn's multiple comparisons test; significant differences had a *P*-value that was controlled at 0.05.

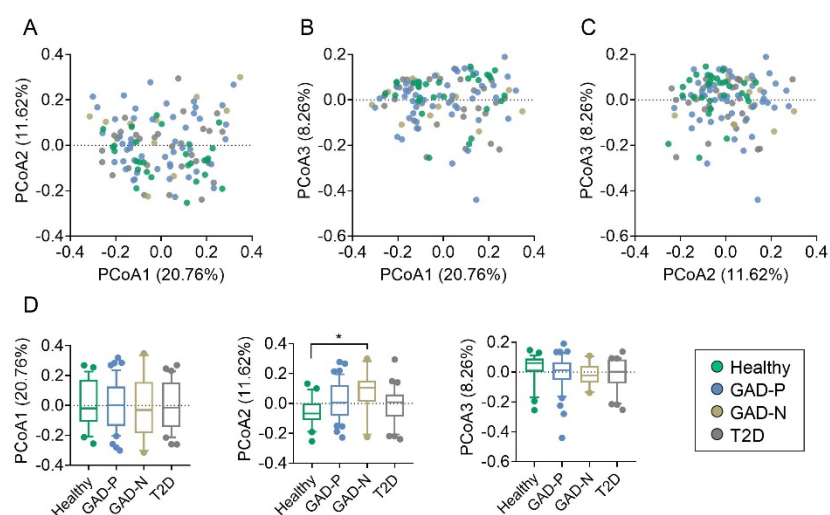

**Supplementary Figure 12**—Comparison of the fecal metabolites detected in the positive ion mode between healthy, GADA-positive (GADA-P), GADA-negative (GADA-N), and type 2 diabetes (T2D) groups. Comparisons were performed using the Kruskal-Wallis test with Dunn's multiple comparisons test; for significant differences,

the *P*-value was controlled at 0.05.

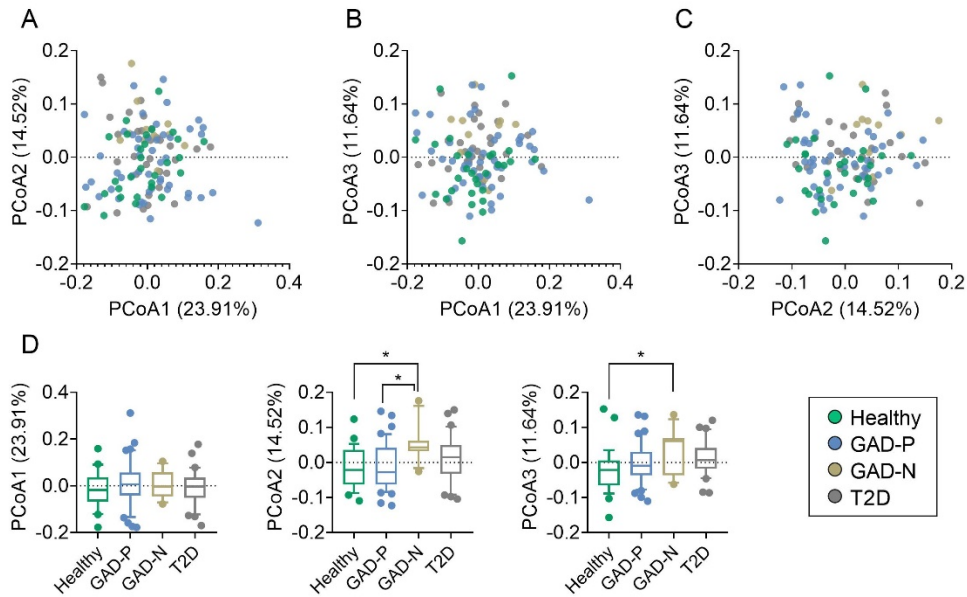

**Supplementary Figure 13**—Comparison of the serum metabolites detected in the negative ion mode between healthy, GADA-positive (GADA-P), GADA-negative (GADA-N), and type 2 diabetes (T2D) groups. Comparisons were performed using the Kruskal-Wallis test with Dunn's multiple comparisons test; for significant differences, the *P*-value was controlled at 0.05.

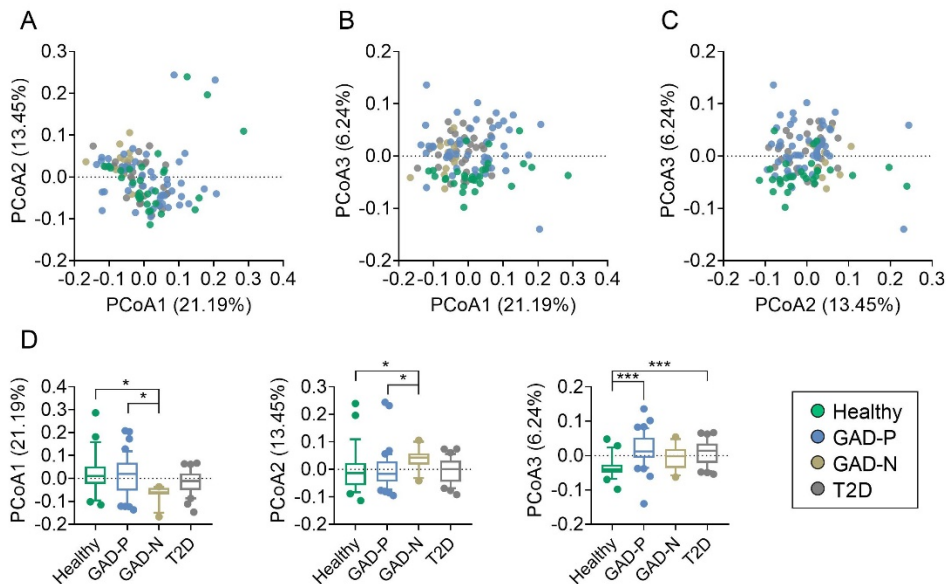

**Supplementary Figure 14**—Comparison of the serum metabolites detected in the negative ion mode between healthy, GADA-positive (GADA-P), GADA-negative (GADA-N), and type 2 diabetes (T2D) groups. Comparisons were performed using the Kruskal-Wallis test with Dunn's multiple comparisons test; for significant differences,

the *P*-value was controlled at 0.05.

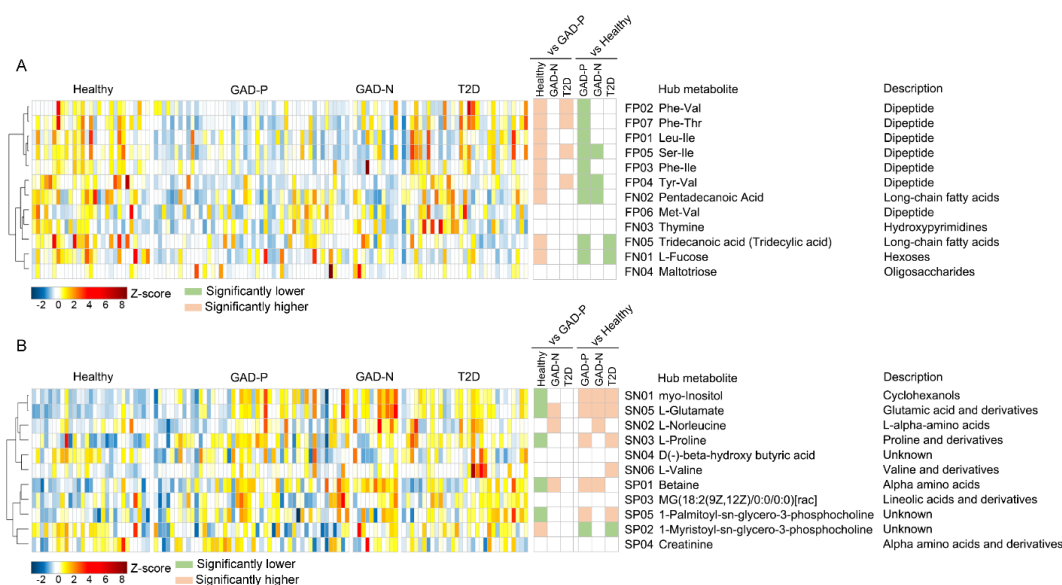

**Supplementary Figure 15**—Comparison of the major fecal and serum modules among healthy, GADA-positive (GADA-P), GADA-negative (GADA-N), and type 2 diabetes (T2D) groups. A, Distribution of the 12 fecal metabolite modules among the five groups. The abundance profiles were transformed into Z scores by subtracting the average abundance and dividing the standard deviations of all the samples. The Z score was negative (shown in blue) when the row abundance was lower than the mean. Comparisons among the abundance of each module among 5 groups were performed using the Kruskal-Wallis test with Dunn's multiple comparisons test; significant differences had a *P*-value was controlled at 0.05. B, Distribution of the 11 serum metabolite modules among the five groups. The abundance profiles were transformed into Z scores by subtracting the average abundance and dividing the standard deviations of all the samples. The Z score was negative (shown in blue) when the row abundance was lower than the mean. Comparisons among the abundance of each module among 5 groups were performed using the Kruskal-Wallis test with Dunn's multiple comparisons test; significant differences had a *P*-value was controlled at 0.05.
